# Supplementary material for: Dopamine receptor activation elicits a possible stress-related coping behavior in a wild-caught songbird
Source: PeerJ. 2022 Jul 1;10:e13520. doi: 10.7717/peerj.13520 (PMC9252180; doi:10.7717/peerj.13520)
Supplement: Supplemental Information 1 — The count data for each behavior as well as the bird’s ID, trial order number, number of days each bird was in captivity, and treatment administered. [file peerj-10-13520-s001.xlsx]

## Sheet: Sheet1
trial ID	focal_ID	nonfocal_ID	trial_number	drug	day_captivity	biting_count_before	aggression_count_before	move_count_before	preening_count_before	feather_count_before	bill_count_before	biting_count_after	aggression_count_after	move_count_after	preening_count_after	feather_count_after	bill_count_after	change_biting	change_aggresion	change_move	change_preening	change_feather	change_bill
4.2.16.14	m16	m14	2	con	27	0	0	0	0	2	0	0	0	1	0	4	0	0	0	1	0	2	0
3.31.16.14	m16	m14	1	rac	25	6	0	123	4	7	3	1	0	1	0	0	0	-5	0	-122	-4	-7	-3
4.4.16.14	m16	m14	3	ppht	29	0	0	1	0	0	0	203	21	6	0	0	1	203	21	5	0	0	1
4.7.16.14	m14	m16	1	con	64	0	1	1	0	0	0	0	0	0	0	0	0	0	-1	-1	0	0	0
4.11.16.14	m14	m16	3	rac	68	0	0	0	0	0	0	133	0	0	0	0	0	133	0	0	0	0	0
4.9.16.14	m14	m16	2	ppht	66	0	0	1	0	0	0	0	0	0	0	0	0	0	0	-1	0	0	0
4.16.19.20	m19	m20	1	ppht	18	6	1	334	0	8	1	76	2	6	0	0	0	70	1	-328	0	-8	-1
4.23.19.20	m19	m20	2	con	25	0	0	488	12	10	1	0	1	370	0	6	4	0	1	-118	-12	-4	3
4.25.19.20	m19	m20	3	rac	27	0	0	0	0	8	0	0	0	0	0	11	0	0	0	0	0	3	0
4.27.19.20	m20	m19	1	rac	28	0	0	210	0	11	4	0	0	125	0	5	0	0	0	-85	0	-6	-4
4.29.19.20	m20	m19	2	ppht	30	0	0	11	3	17	5	81	3	2	0	0	0	81	3	-9	-3	-17	-5
5.1.19.20	m20	m19	3	con	32	0	0	0	0	16	14	0	0	0	4	22	3	0	0	0	4	6	-11
4.24.18.13	m18	m13	1	con	49	33	0	68	40	8	1	11	0	27	0	9	5	-22	0	-41	-40	1	4
4.26.18.13	m18	m13	2	rac	51	1	0	8	2	23	2	0	1	0	1	0	0	-1	1	-8	-1	-23	-2
4.28.18.13	m18	m13	3	ppht	53	0	0	1	0	3	0	241	1	59	0	1	0	241	1	58	0	-2	0
4.30.18.13	m13	m18	1	rac	63	0	0	1	5	0	0	0	0	0	0	0	0	0	0	-1	-5	0	0
5.2.18.13	m13	m18	2	con	92	0	0	1	0	2	0	0	0	0	0	1	0	0	0	-1	0	-1	0
5.5.18.13	m13	m18	3	ppht	95	0	0	10	0	1	0	155	0	14	0	0	0	155	0	4	0	-1	0
5.6.24.25	m24	m25	1	ppht	8	25	2	53	0	7	2	288	1	57	0	0	0	263	-1	4	0	-7	-2
5.8.24.25	m24	m25	2	rac	10	0	4	82	89	7	2	0	1	223	0	7	0	0	-3	141	-89	0	-2
5.10.24.25	m24	m25	3	con	12	1	0	0	4	20	1	18	2	1	20	14	6	17	2	1	16	-6	5
5.14.24.25	m25	m24	1	rac	16	0	0	1	0	11	1	0	0	0	0	0	0	0	0	-1	0	-11	-1
5.16.24.25	m25	m24	2	con	18	0	0	8	0	7	4	0	0	1	3	12	5	0	0	-7	3	5	1
5.20.24.25	m25	m24	3	ppht	22	0	0	11	0	8	1	130	1	12	1	0	0	130	1	1	1	-8	-1
4.30.15.23	m15	m23	1	rac	87	0	1	163	21	18	2	0	1	335	0	5	0	0	0	172	-21	-13	-2
5.2.15.23	m15	m23	2	con	89	0	0	1	0	3	0	0	0	0	0	13	0	0	0	-1	0	10	0
5.7.15.23	m15	m23	3	ppht	94	0	0	2	0	8	0	243	0	12	0	0	2	243	0	10	0	-8	2
5.9.15.23	m23	m15	1	ppht	17	0	0	3	0	16	3	195	0	44	0	0	1	195	0	41	0	-16	-2
5.13.15.23	m23	m15	2	con	21	0	0	8	0	15	9	0	0	0	0	0	1	0	0	-8	0	-15	-8
5.15.15.23	m23	m15	3	rac	23	0	0	13	0	15	2	0	3	3	9	8	1	0	3	-10	9	-7	-1
5.21.28.29	m29	m28	1	con	11	0	1	56	0	18	1	0	0	86	0	14	4	0	-1	30	0	-4	3
5.23.28.29	m29	m28	2	rac	13	0	0	60	0	9	1	0	11	169	0	0	0	0	11	109	0	-9	-1
5.27.28.29	m29	m28	3	ppht	17	0	0	3	1	10	1	170	0	10	0	0	0	170	0	7	-1	-10	-1
5.29.28.29	m28	m29	1	con	19	0	0	1	0	8	1	0	0	1	0	14	3	0	0	0	0	6	2
5.31.28.29	m28	m29	2	ppht	21	0	0	2	0	8	1	111	6	14	0	0	0	111	6	12	0	-8	-1
6.2.28.29	m28	m29	3	rac	23	0	0	8	0	12	1	0	0	0	0	0	0	0	0	-8	0	-12	-1
5.6.27.26	m27	m26	1	con	8	16	0	427	0	3	1	5	0	389	0	3	8	-11	0	-38	0	0	7
5.8.27.26	m27	m26	2	ppht	10	0	0	504	0	3	1	415	1	18	0	0	0	415	1	-486	0	-3	-1
5.10.27.26	m27	m26	3	rac	12	0	0	497	0	0	0	0	0	465	0	3	0	0	0	-32	0	3	0
5.15.27.26	m26	m27	1	ppht	17	0	0	406	0	1	1	182	2	26	0	0	0	182	2	-380	0	-1	-1
5.17.27.26	m26	m27	2	rac	19	0	0	353	0	0	11	0	8	349	11	2	0	0	8	-4	11	2	-11
5.20.27.26	m26	m27	3	con	22	0	1	0	0	5	2	0	1	0	0	1	3	0	0	0	0	-4	1
5.26.33.32	m33	m32	1	con	9	0	1	52	0	43	3	0	0	68	0	25	21	0	-1	16	0	-18	18
5.28.33.32	m33	m32	2	rac	11	0	0	25	0	29	5	0	0	0	0	15	0	0	0	-25	0	-14	-5
5.30.33.32	m33	m32	3	ppht	13	0	0	0	0	8	1	83	2	38	0	1	0	83	2	38	0	-7	-1
6.1.33.32	m32	m33	1	con	15	0	0	0	0	4	0	0	0	0	0	0	0	0	0	0	0	-4	0
6.4.33.32	m32	m33	2	rac	18	0	0	0	8	18	0	0	0	0	0	0	0	0	0	0	-8	-18	0
6.6.33.32	m32	m33	3	ppht	20	0	0	1	0	1	1	167	2	1	0	0	0	167	2	0	0	-1	-1
5.27.31.30	m31	m30	1	rac	10	0	1	419	0	3	1	0	50	21	0	8	0	0	49	-398	0	5	-1
5.29.31.30	m31	m30	2	con	12	0	0	260	0	1	1	0	0	144	10	2	1	0	0	-116	10	1	0
5.31.31.30	m31	m30	3	ppht	14	0	0	53	3	12	1	223	0	1	0	0	0	223	0	-52	-3	-12	-1
6.3.31.30	m30	m31	1	rac	20	0	0	0	0	17	1	0	0	0	0	14	0	0	0	0	0	-3	-1
6.5.31.30	m30	m31	2	con	22	0	2	1	0	15	2	0	2	1	0	21	0	0	0	0	0	6	-2
6.7.31.30	m30	m31	3	ppht	24	0	0	0	0	36	0	192	9	1	3	0	0	192	9	1	3	-36	0
6.3.34.35	m34	m35	1	ppht	13	0	5	192	0	4	6	118	14	1	0	1	0	118	9	-191	0	-3	-6
6.5.34.35	m34	m35	2	con	15	5	0	280	0	8	17	2	0	230	49	3	4	-3	0	-50	49	-5	-13
6.7.34.35	m34	m35	3	rac	17	0	0	313	0	3	1	0	0	0	0	1	9	0	0	-313	0	-2	8
6.9.34.35	m35	m34	1	rac	18	0	0	0	0	4	0	0	1	0	0	3	0	0	1	0	0	-1	0
6.11.34.35	m35	m34	2	ppht	20	1	0	3	0	19	23	201	5	46	0	0	0	200	5	43	0	-19	-23
6.13.34.35	m35	m34	3	con	22	2	0	18	0	7	24	0	1	1	1	8	1	-2	1	-17	1	1	-23
